# Supplementary material for: From defence to damage: the impact of seawater passivation on microbially influenced corrosion in CuNi 70/30 alloy
Source: Royal Society of Chemistry journal article supplement (doi:10.1039/d4ew00562g), 2024-01-01
Supplement: d4ew00562g1.pdf [file d4ew00562g1.pdf]

## From defence to damage: The impact of seawater passivation on microbially influenced corrosion in CuNi 70/30 alloy

MA Javed<sup>1</sup>, WC Neil<sup>2</sup>, SA Wade<sup>1</sup>

<sup>1</sup>School of Science, Computing and Engineering Technologies, Swinburne University of Technology, Melbourne Australia

<sup>2</sup>Defence Science technology Group, Melbourne, Australia

### Supplementary Data

**Table S1.** Chemical composition of the natural seawater used for passivation and corrosion testing in this study.

| Test                 | Units               | Seawater |
|----------------------|---------------------|----------|
| Chloride             | mg l <sup>-1</sup>  | 20000    |
| Calcium              | mg l <sup>-1</sup>  | 540      |
| Magnesium            | mg l <sup>-1</sup>  | 1600     |
| Potassium            | mg l <sup>-1</sup>  | 530      |
| Sodium               | mg l <sup>-1</sup>  | 10000    |
| Iron                 | mg l <sup>-1</sup>  | < 0.05   |
| Phosphate            | mg l <sup>-1</sup>  | 0.08     |
| Sulphate             | mg l <sup>-1</sup>  | 2600     |
| Nitrate              | mg l <sup>-1</sup>  | < 0.02   |
| Total alkalinity     | mg l <sup>-1</sup>  | 170      |
| Total organic carbon | mg l <sup>-1</sup>  | < 5      |
| pH                   | pH units            | 8.0      |
| Conductivity         | μS cm <sup>-1</sup> | 63000    |

**Table S2.** EDS elemental composition of non-passivated and seawater passivated samples.

| Sample types        | Elemental composition (at %) |            |           |           |           |            |
|---------------------|------------------------------|------------|-----------|-----------|-----------|------------|
|                     | Cu                           | Ni         | Fe        | Mn        | Cl        | O          |
| Non-passivated      | 65.7 ± 0.1                   | 32.7 ± 0.3 | 0.6 ± 0.1 | 1.0 ± 0.1 | -         | -          |
| Seawater passivated | 44.7 ± 0.4                   | 23.6 ± 0.2 | 0.6 ± 0.0 | 0.7 ± 0.0 | 0.3 ± 0.1 | 30.1 ± 0.4 |

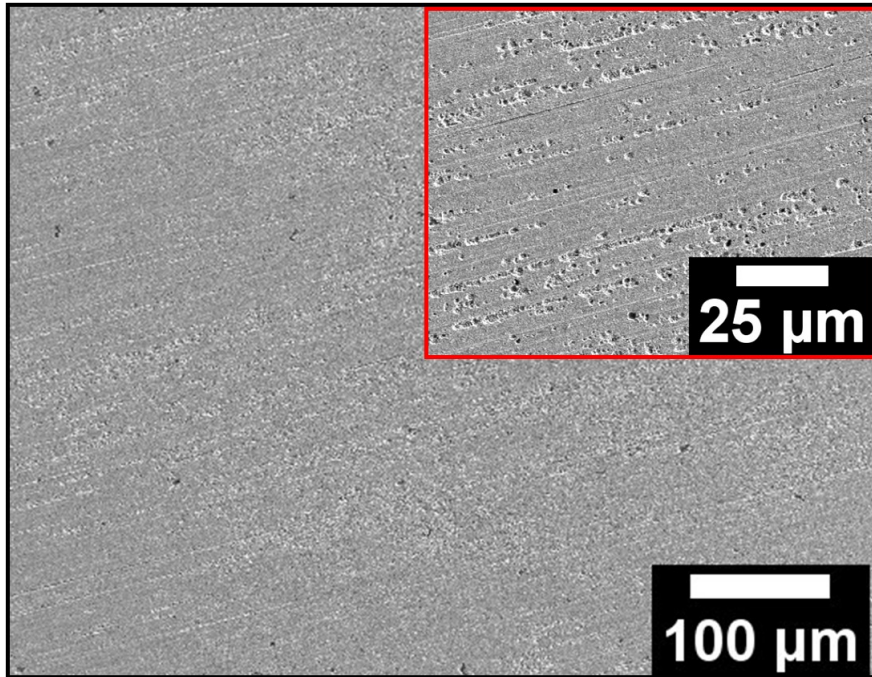

**Fig. S1.** SEM images after removal of surface film formed on seawater passivated samples for 35 days. The insets provide higher magnification images of the corresponding coupon surface.

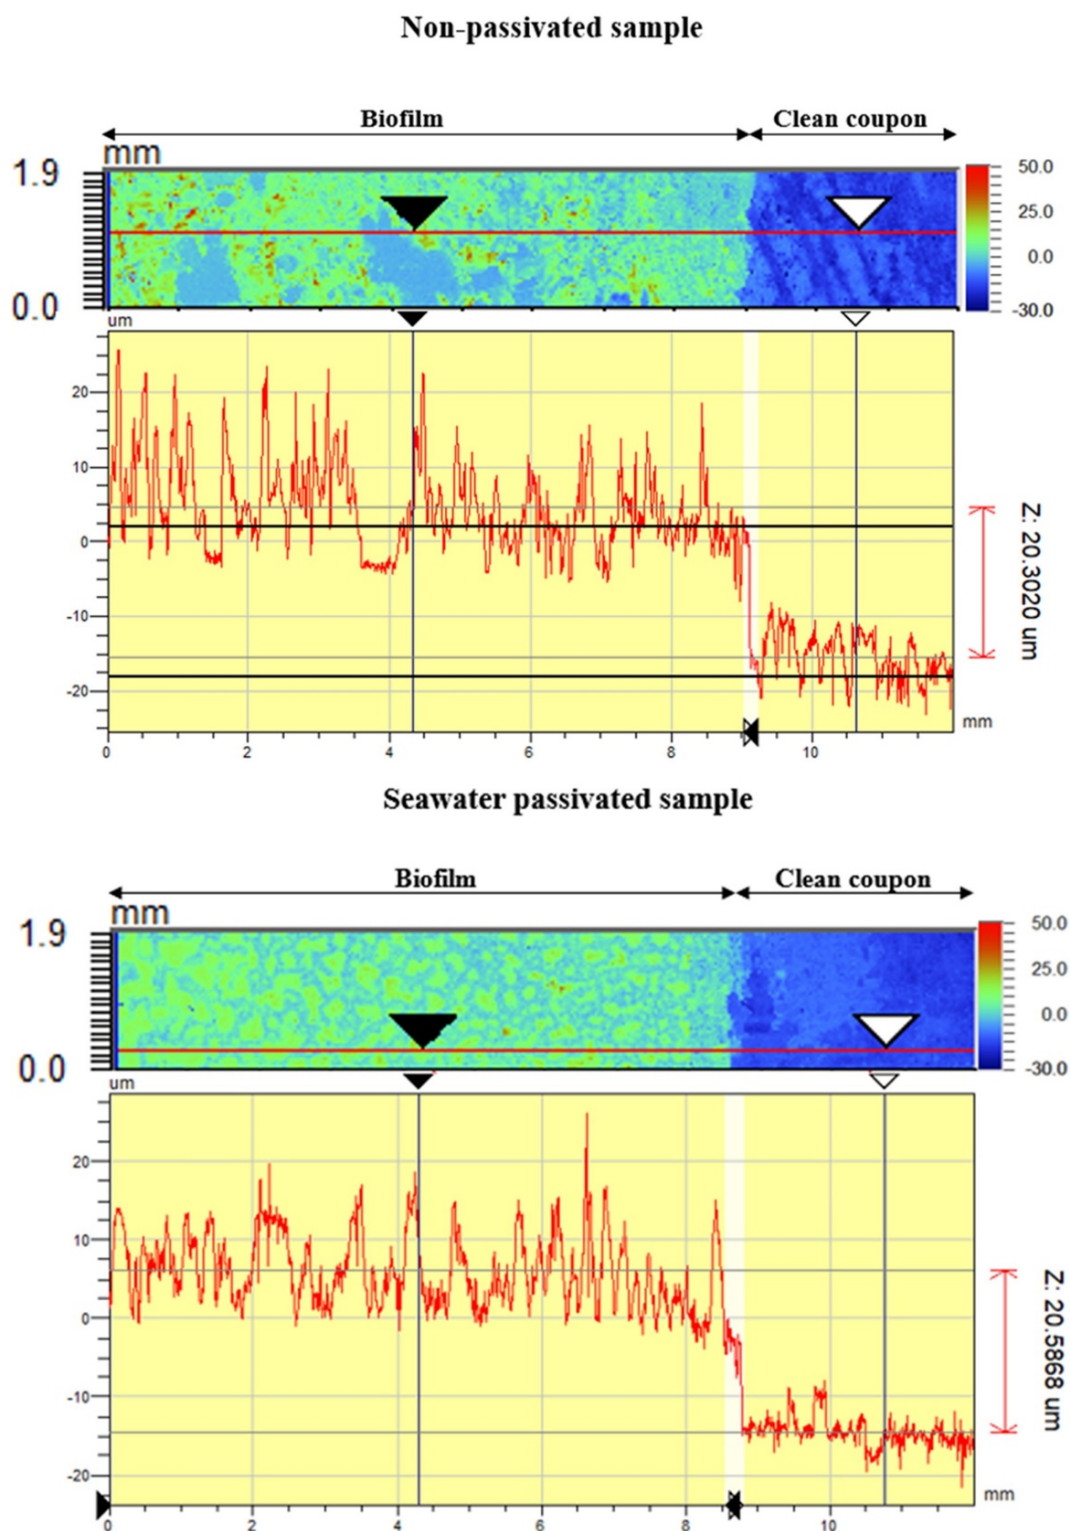

**Fig. S2.** 3D optical profilometer images showing biofilm thickness on the non-passivated and seawater passivated samples following immersion in SRB inoculated MB medium for 28 days. The regions on the right-hand side of the images represent areas where the biofilm was removed, revealing the CuNi alloy surfaces.

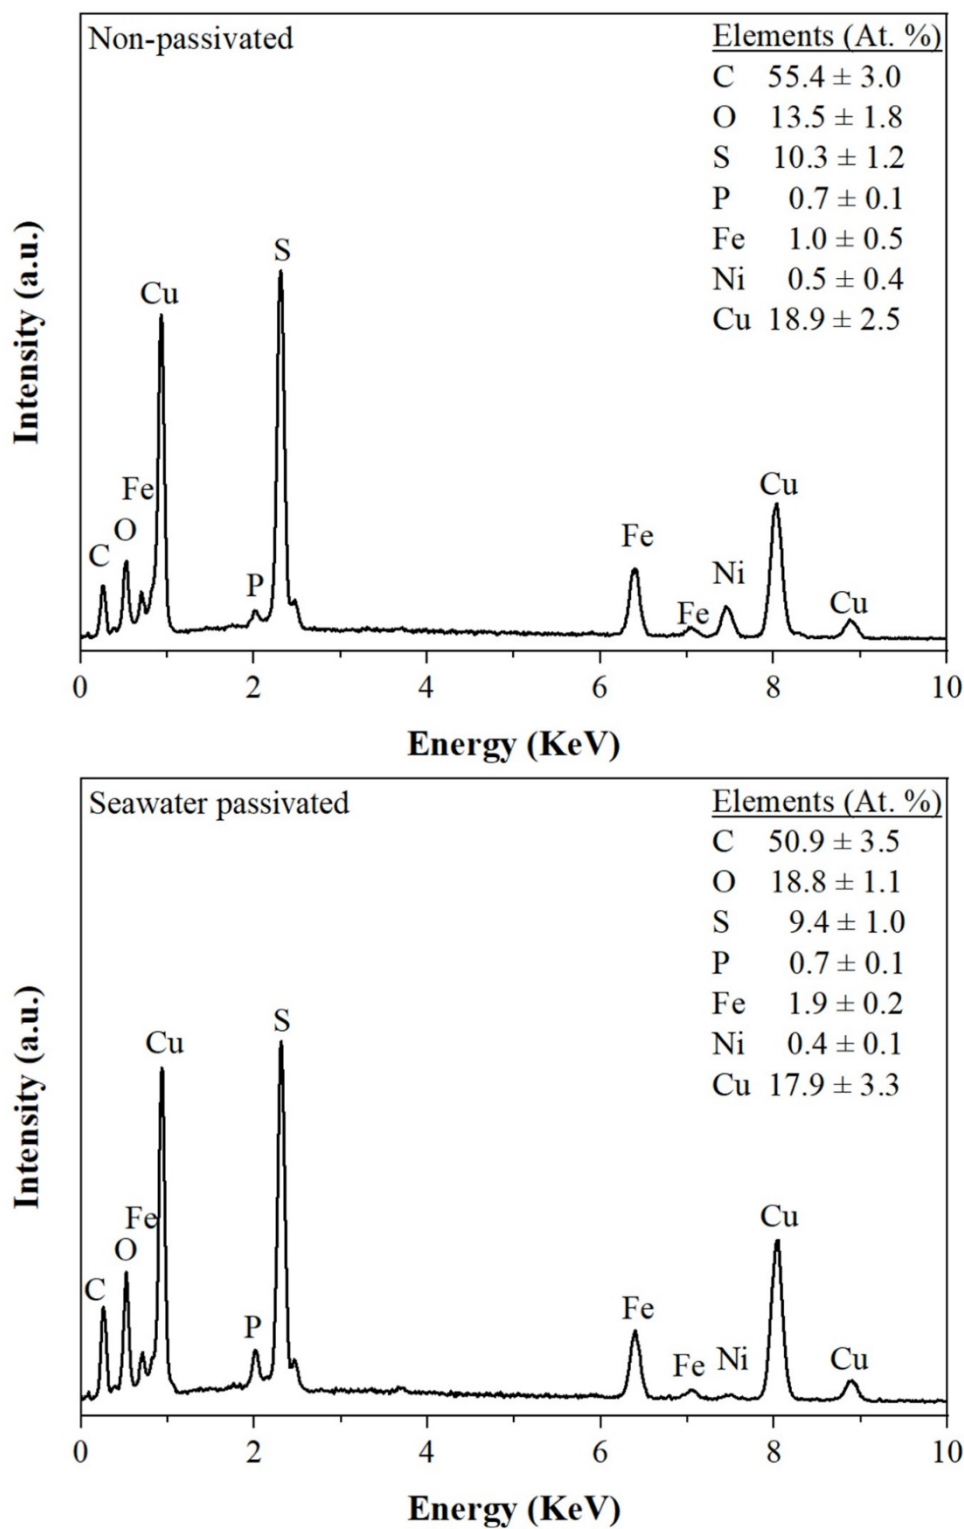

**Fig. S3.** EDS spectra of biofilm formed on the non-passivated and seawater passivated samples following immersion in SRB inoculated MB medium for 28 days.
